# Supplementary material
Source: publisher site journal article supplement (https://www.dovepress.com/article/373177)

### Supplemental Figure S1

Distribution of *Ailanthus altissima* trees planted in Leipzig based on the tree registry of the City of Leipzig (<https://www.leipzig.de/umwelt-und-verkehr/umwelt-und-naturschutz/baeume-und-baumschutz/stadtbaeume/>).

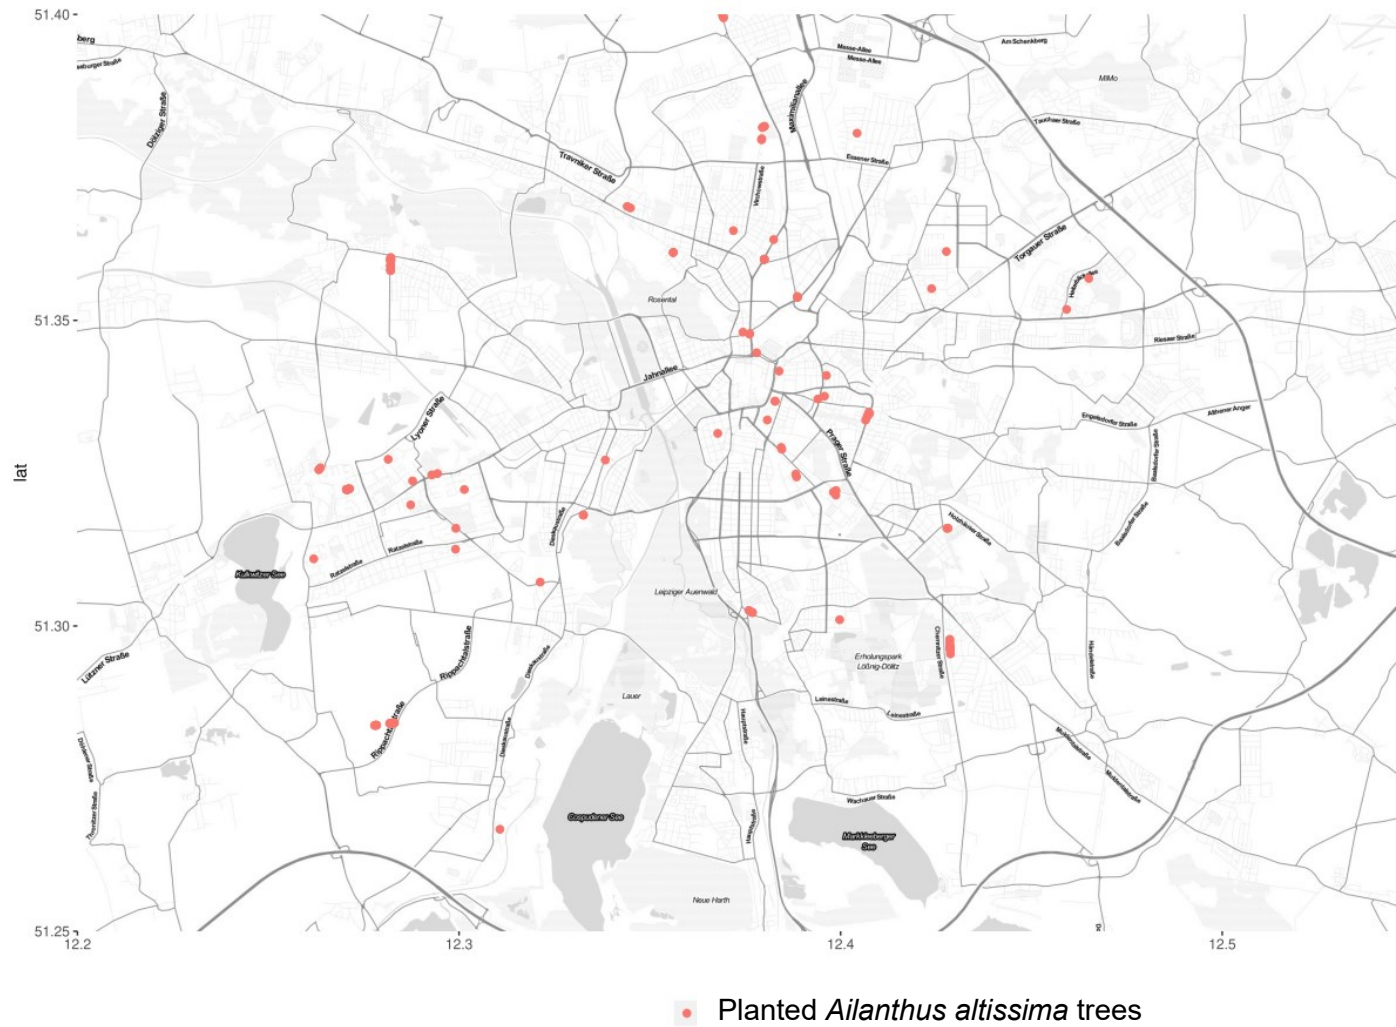

### Supplemental Figure S2

Pollen traps used in the study. A) Exemplary image of volumetric Hirst-type pollen trap which was used to collect pollen on the roof of the University Hospital. B) and C) Selfmade pollen traps to study pollen distribution fixed with a wire on a handrail, consisting of an object slide fixed with double-sided adhesive tape in a slide mailing box. To ensure that the pollen lid of the slide mailing box does not close, the lid is fixed with a toothpick. The object slide was covered with vaseline and exposed for one week.

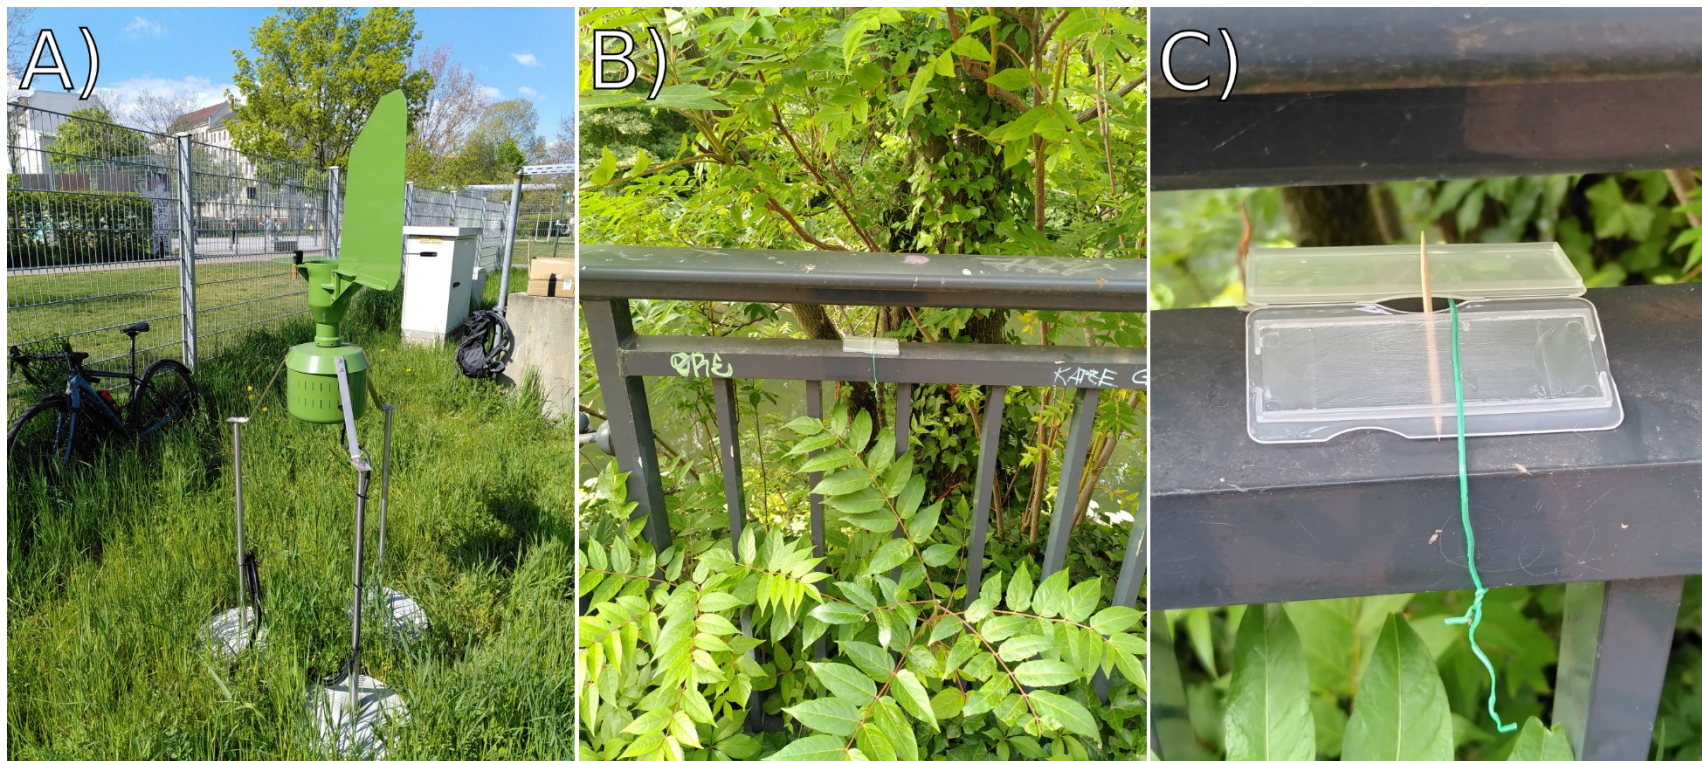

Supplement: Supplementary file 1 [file get_supplementary_file.php]
